# Supplementary material for: TRIM41 is required to innate antiviral response by polyubiquitinating BCL10 and recruiting NEMO
Source: PubMed Central journal article supplement (PMC7914255; doi:10.1038/s41392-021-00477-8), 2021-02-28

Figure 1e

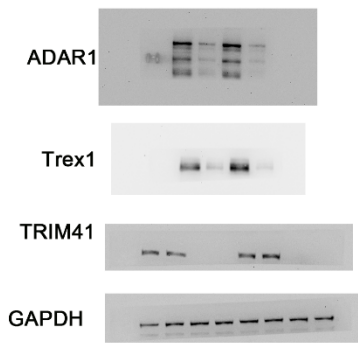

Fig S3

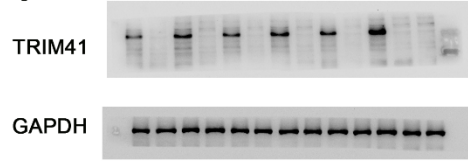

Figure S1b

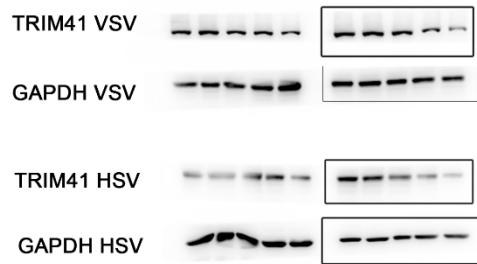

Figure S1c

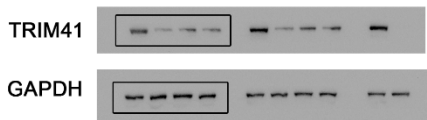

Figure S2e

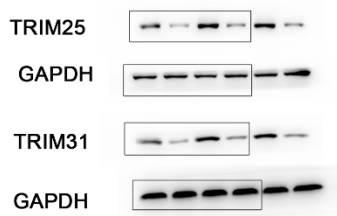

Figure S2f

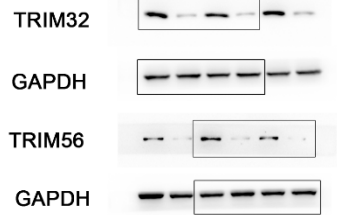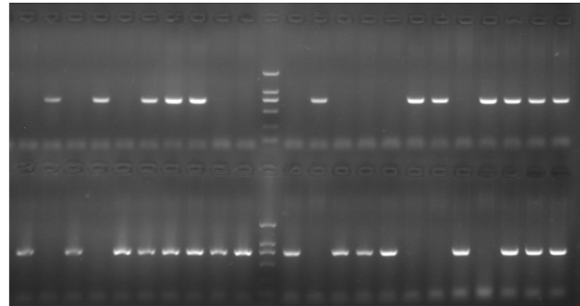

Genotyping of Trim41 mice

Fig 2f

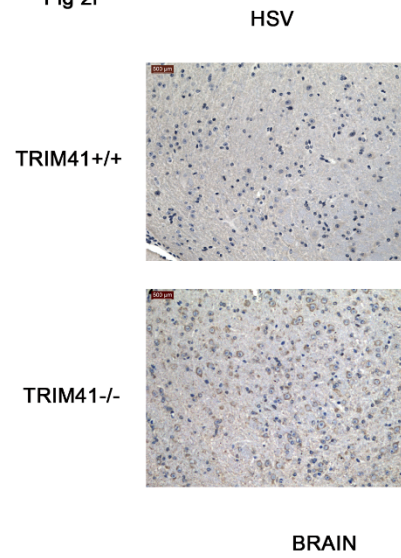

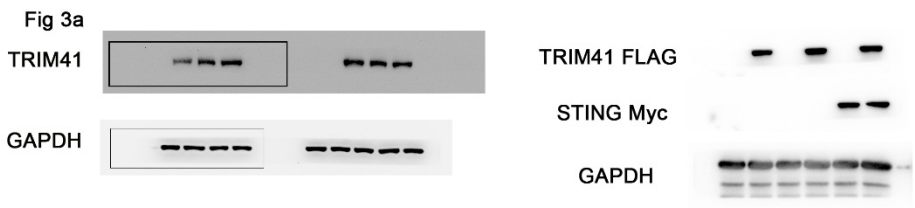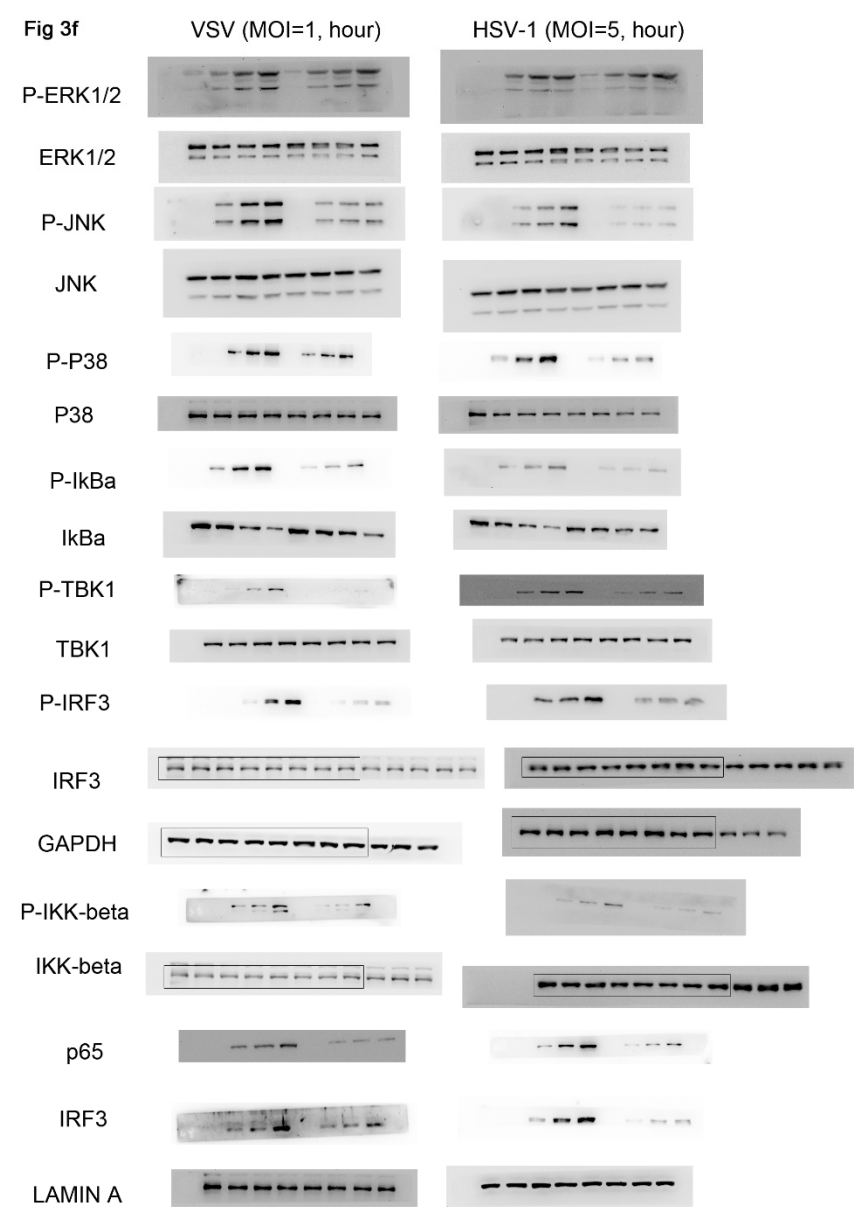

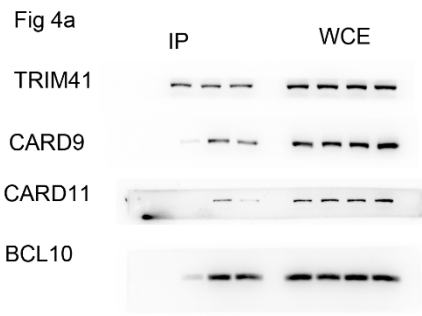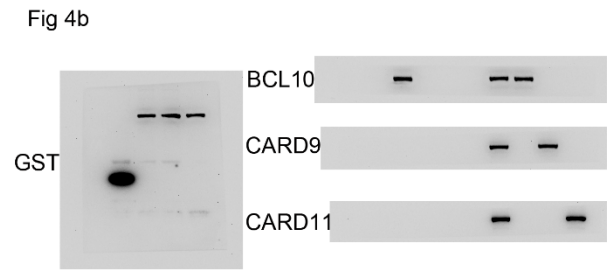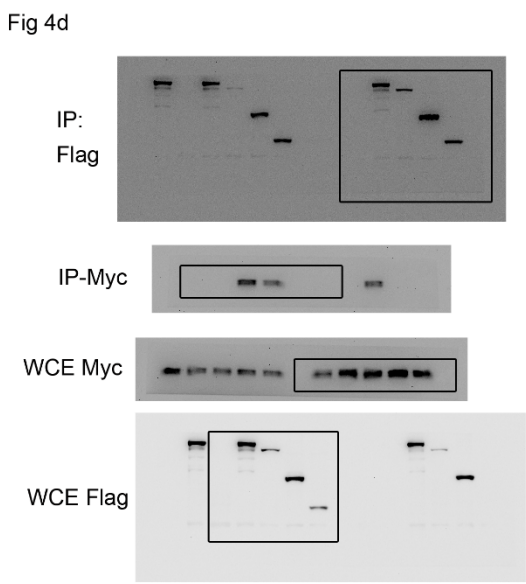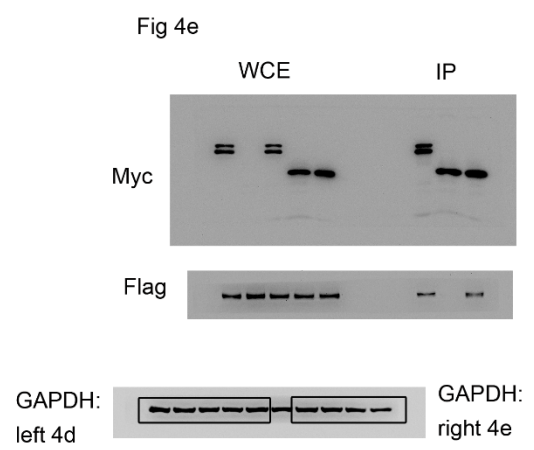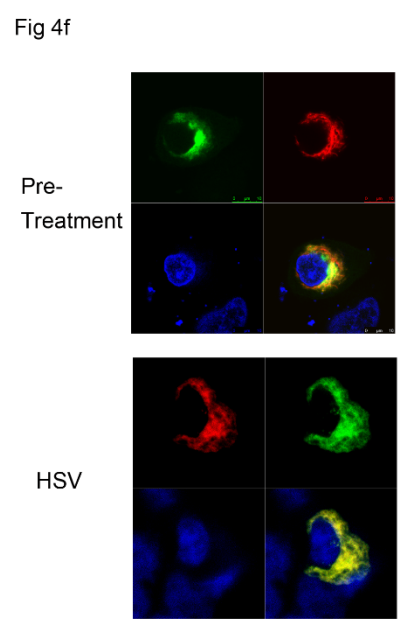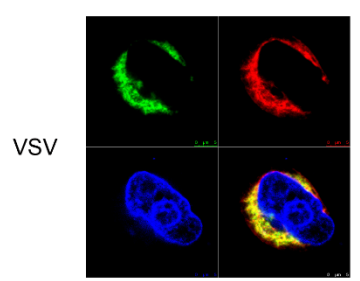

Fig 5a

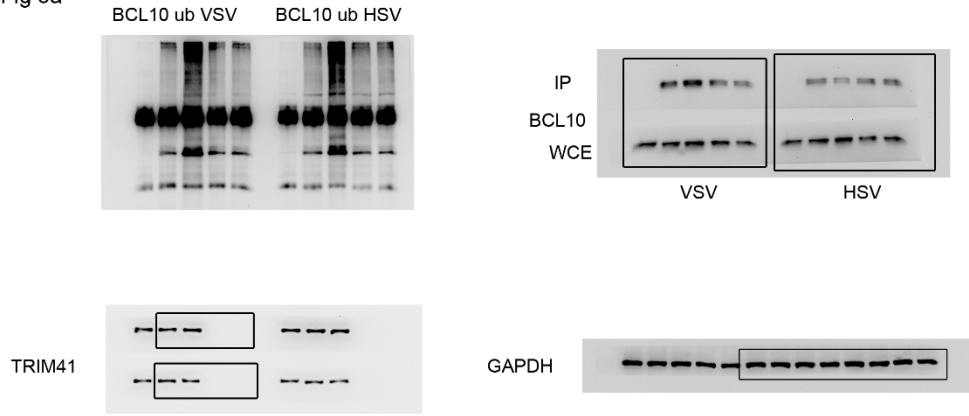

Fig 5b

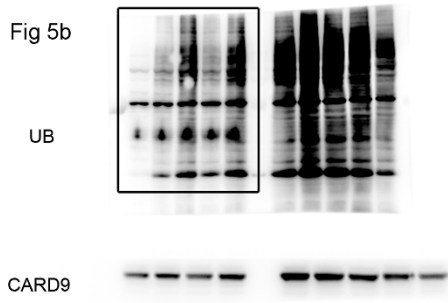

Fig 5c

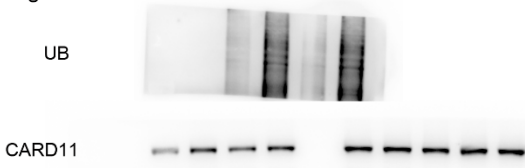

Fig 5d

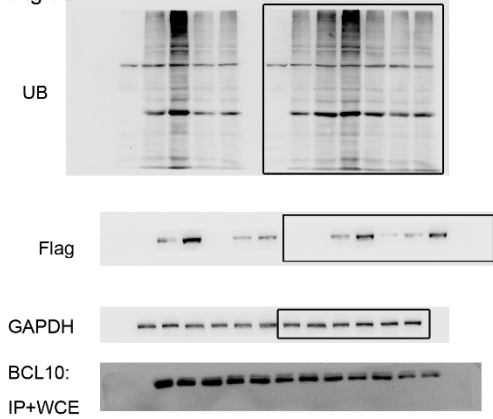

Fig 5e

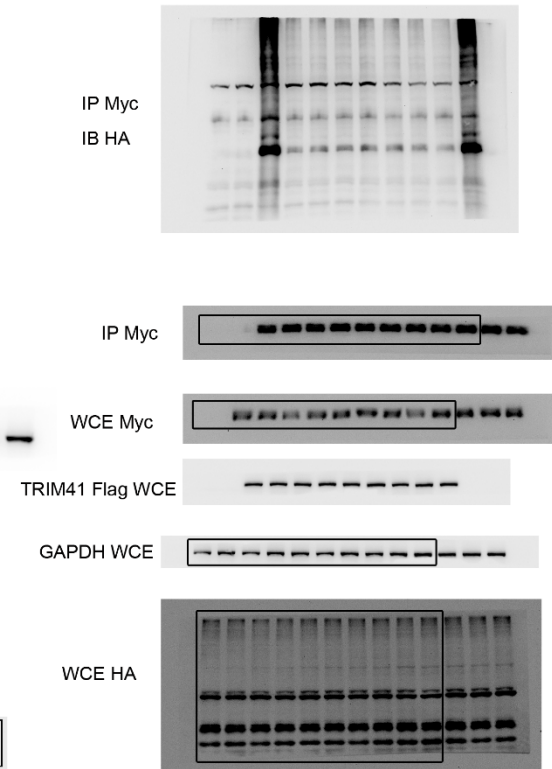

Fig 5f

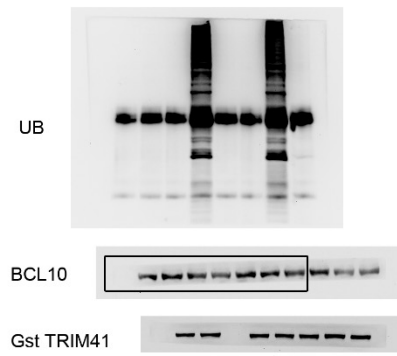

Fig 5g

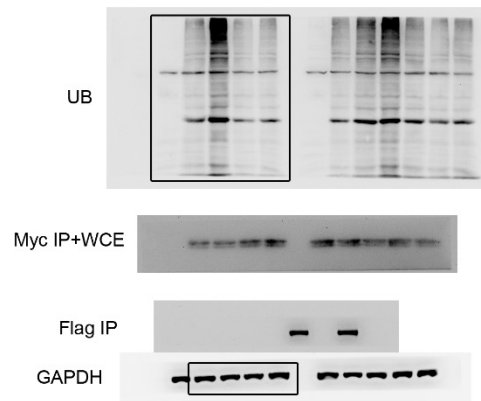

Fig 6a-6b

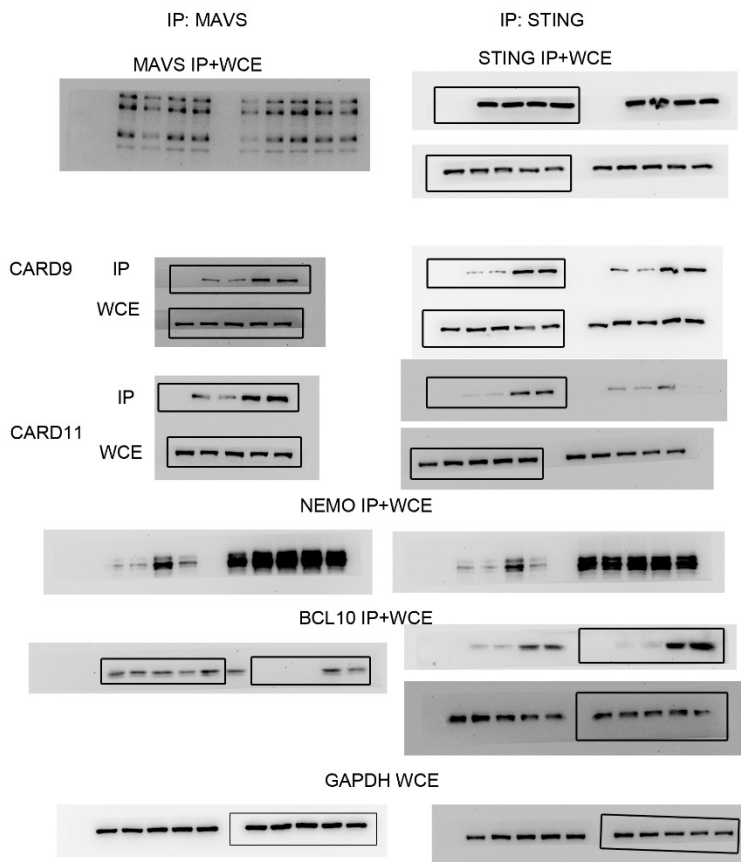

Fig S5a

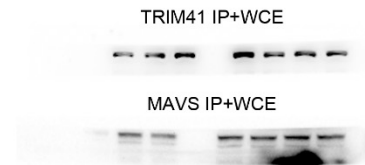

Fig S5b

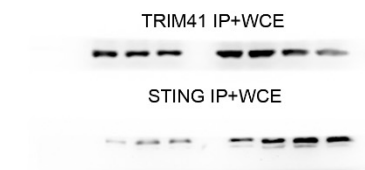

Fig 6c

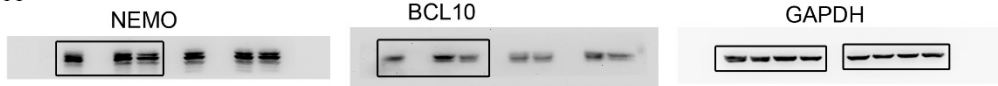

Fig 6e-6f

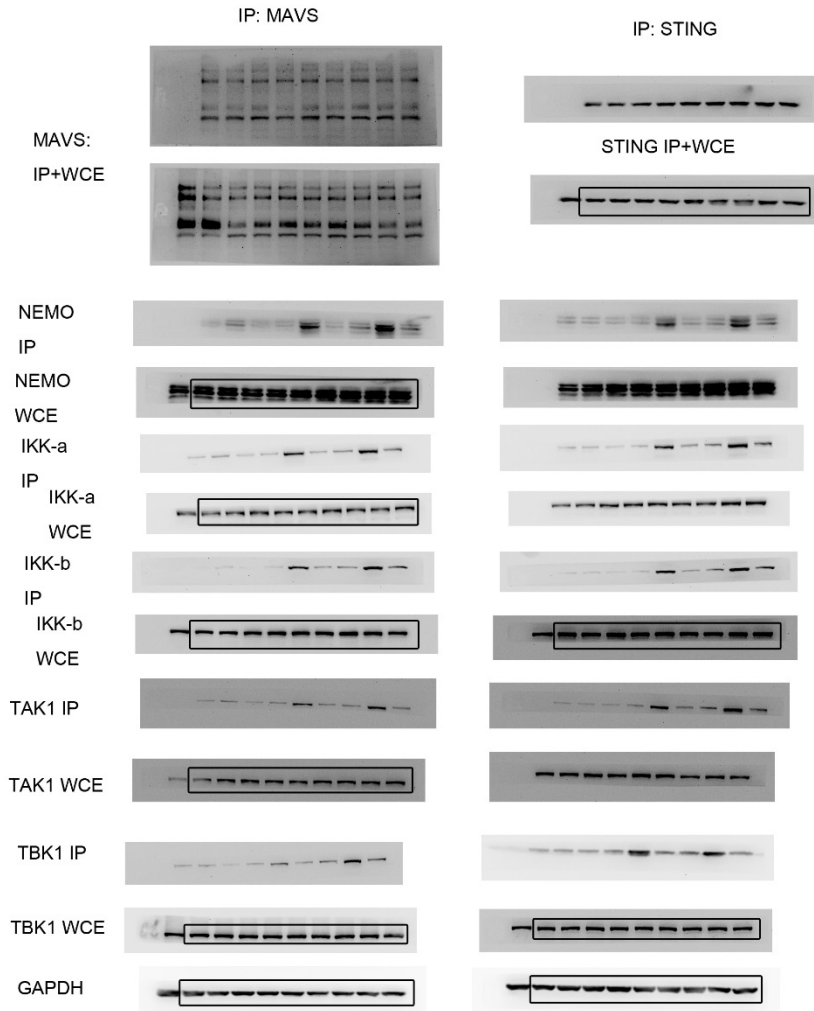

Supplement: 41392_2021_477_MOESM2_ESM.pdf [file 41392_2021_477_MOESM2_ESM.pdf]
