# Supplementary material for: TRIM41 is required to innate antiviral response by polyubiquitinating BCL10 and recruiting NEMO
Source: PubMed Central journal article supplement (PMC7914255; doi:10.1038/s41392-021-00477-8), 2021-02-28
Supplement: 41392_2021_477_MOESM1_ESM.pdf [file 41392_2021_477_MOESM1_ESM.pdf]

## Supplementary data for

### **TRIM41 is required to innate antiviral response by polyubiquitinating BCL10 and recruiting NEMO**

Zhou Yu<sup>1,2,3,†</sup>, Xuelian Li<sup>3,4,†</sup>, Mingjin Yang<sup>3,†</sup>, Jiaying Huang<sup>4</sup>, Qian Fang<sup>3</sup>, Jianjun  
Jia<sup>3</sup>, Zheng Li<sup>3</sup>, Yan Gu<sup>3</sup>, Taoyong Chen<sup>3,\*</sup> & Xuetao Cao<sup>1,2,3,4,5,\*</sup>

<sup>1</sup> Center for Systems Medicine, Department of Immunology, Institute of Basic Medical Sciences, Peking Union Medical College, Chinese Academy of Medical Sciences, Beijing 100005, China

<sup>2</sup> Suzhou Institute of Systems Medicine, Suzhou 215123, Jiangsu, China

<sup>3</sup> National Key Laboratory of Medical Immunology & Institute of Immunology, Second Military Medical University, Shanghai 200433, China

<sup>4</sup> Institute of Immunology, Zhejiang University School of Medicine, Hangzhou 310058, China

<sup>5</sup> College of Life Science, Nankai University, Tianjin 300071, China

† These authors contributed equally to this work.

\* Corresponding author. E-mail: chenty@immunol.org (T.C.); caoxt@immunol.org (X.C.)

#### **This PDF include:**

- Table S1-S3
- Figures S1-S6

#### **Other Supplementary Materials for this manuscript include the following:**

- Source data for Figures (PDF document)
- Source data for Graphs (Excel document)

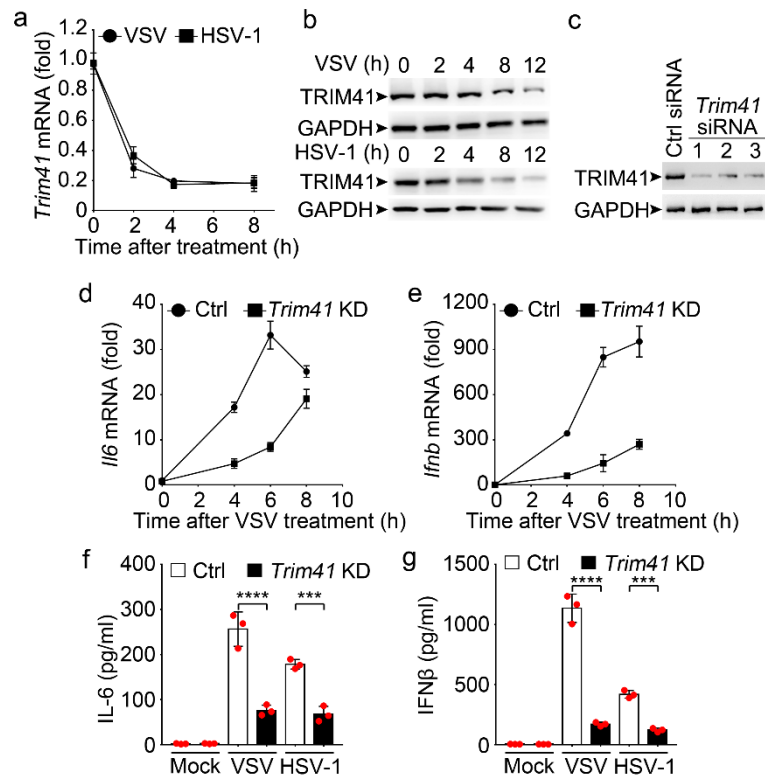

**Figure S1. Knockdown of *Trim41* impairs innate immune response against VSV in peritoneal macrophages.** **a, b** Peritoneal macrophages from C57BL/6 mice were infected with VSV (MOI = 1) or HSV-1 (MOI = 5). The mRNA levels of *Trim41* were evaluated by Q-PCR (**a**). The protein levels of TRIM41 were evaluated by Western blotting (**b**). **c-g** Peritoneal macrophages from C57BL/6 mice were transfected with control (Ctrl) or *Trim41*-specific siRNAs for 48h. The efficiency of knockdown (KD) was evaluated by Western blotting (**c**). The cells were then infected with VSV (MOI = 1) or HSV-1 (MOI = 5) as indicated (**d** and **e**) or for 8h (**f** and **g**). The mRNA levels of *Il6* and *Ifnb* were evaluated by Q-PCR (**d** and **e**). Amounts of IL-6 and IFN $\beta$  in the supernatants were measured by ELISA (**f** and **g**). Results are presented as mean  $\pm$  SD of triplicate samples (**a** and **d-g**; one-way ANOVA followed by Bonferroni multiple comparison). One representative data of three independent experiments are shown. \*\*\*,  $P < 0.001$ ; \*\*\*\*,  $P < 0.0001$ .

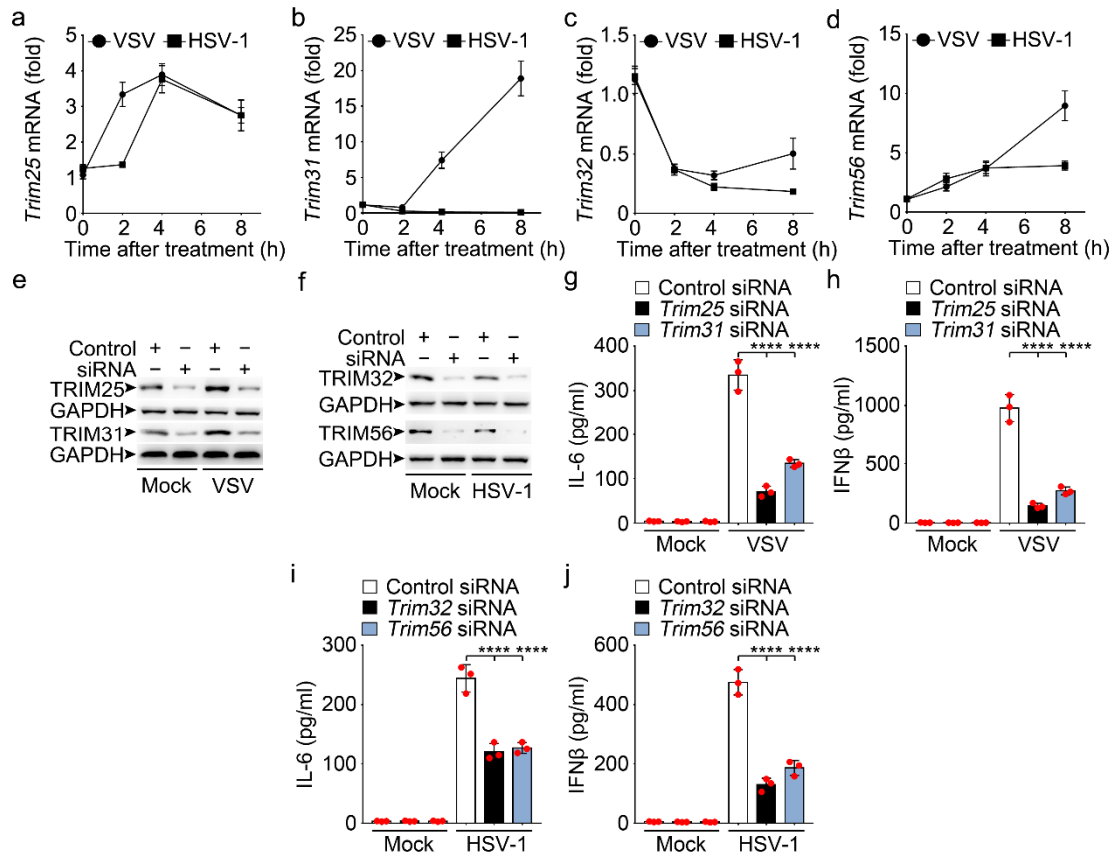

**Figure S2. Confirmation for the role of key TRIM proteins in innate antiviral response, for comparison with TRIM41.** **a-d** Peritoneal macrophages from C57BL/6 mice were infected with VSV (MOI = 1) or HSV-1 (MOI = 5). The mRNA levels of *Trim25* (**a**), *Trim31* (**b**), *Trim32* (**c**) or *Trim56* (**d**) were evaluated by Q-PCR. **e-j** Peritoneal macrophages from C57BL/6 mice were transfected with control (Ctrl) or *Trim*-specific siRNAs as indicated for 48h and then infected with VSV (MOI = 1) or HSV-1 (MOI = 5) for 8h. The efficiency of knockdown was evaluated by Western blotting (**e** and **f**). Amounts of IL-6 and IFNβ in the supernatants were measured by ELISA (**g-j**). Results are presented as mean ± SD of triplicate samples (**a-d** and **g-j**; one-way ANOVA followed by Bonferroni multiple comparison). One representative data of three independent experiments are shown. \*\*\*\*,  $P < 0.0001$ .

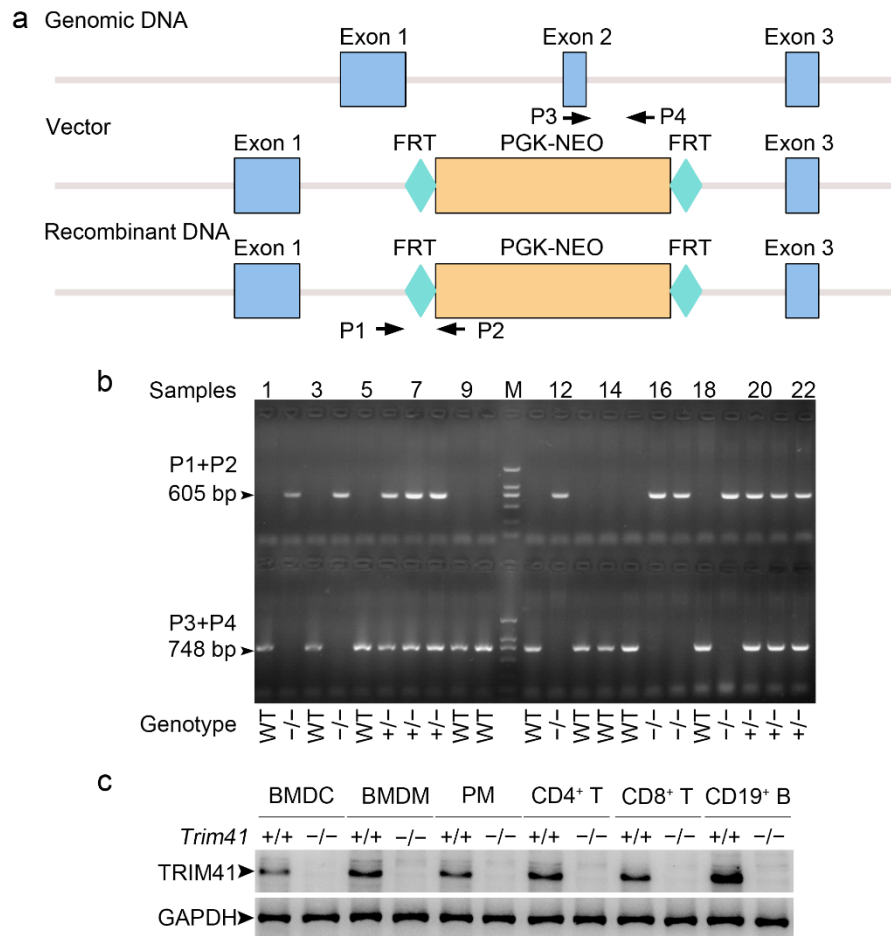

**Figure S3. Establishment of *Trim41* knockout mice.** **a** Strategy to establish *Trim41*<sup>-/-</sup> mice. **b** PCR assays of mice tail DNA for identification of *Trim41*<sup>-/-</sup> mice. M, DNA marker. **c** Western blotting assays of TRIM41 amounts in bone marrow-derived dendritic cells (BMDC), bone marrow-derived macrophages (BMDM), peritoneal macrophages (PM), or splenic CD4<sup>+</sup> T cells, CD8<sup>+</sup> T cells or CD19<sup>+</sup> B cells.

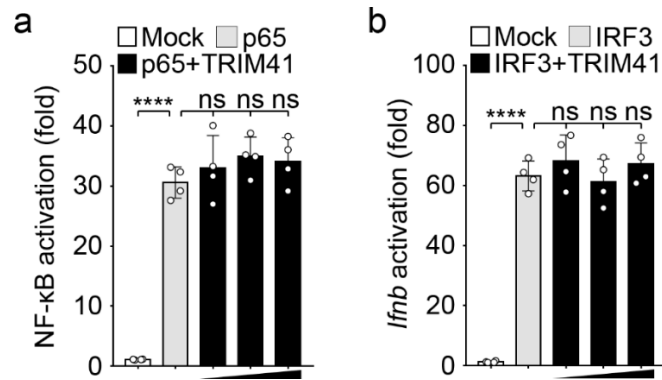

**Figure S4. TRIM41 does not affect p65-mediated or IRF3-mediated activation of NF-κB and *Ifnb* reporters.** **a, b** HEK293T cells were cotransfected with mock, Flag-tagged TRIM41 (10, 50 or 100 ng), p65 (100 ng) or IRF3 (100 ng) vectors and indicated reporter vectors. 48h later, the luciferase activity was determined. Results are presented as mean  $\pm$  SD of four biological samples (one-way ANOVA followed by Bonferroni multiple comparison). One representative experiment of three is shown. ns, not significant; \*\*\*\*,  $P < 0.0001$ .

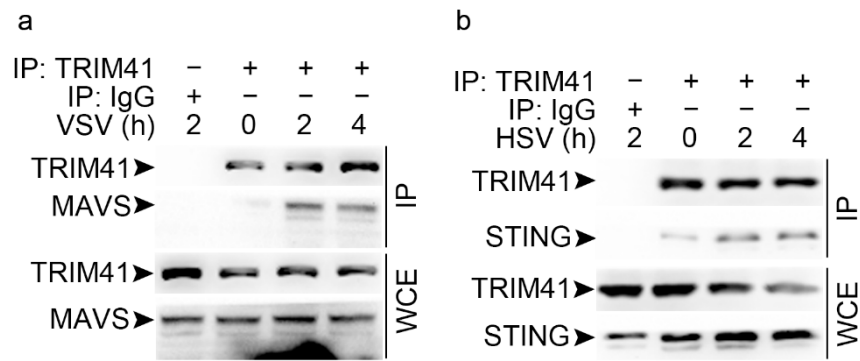

**Figure S5. Endogenous TRIM41 interacts with MAVS and STING.** **a, b** Wild type BMDM cells were infected with VSV (MOI = 1) or HSV-1 (MOI = 5) viruses as indicated. Then whole cell extracts (WCE) were immunoprecipitated with anti-TRIM41 antibody plus protein A/G beads. Components in the TRIM41 complex were examined by Western blotting. One representative experiment of three is shown.

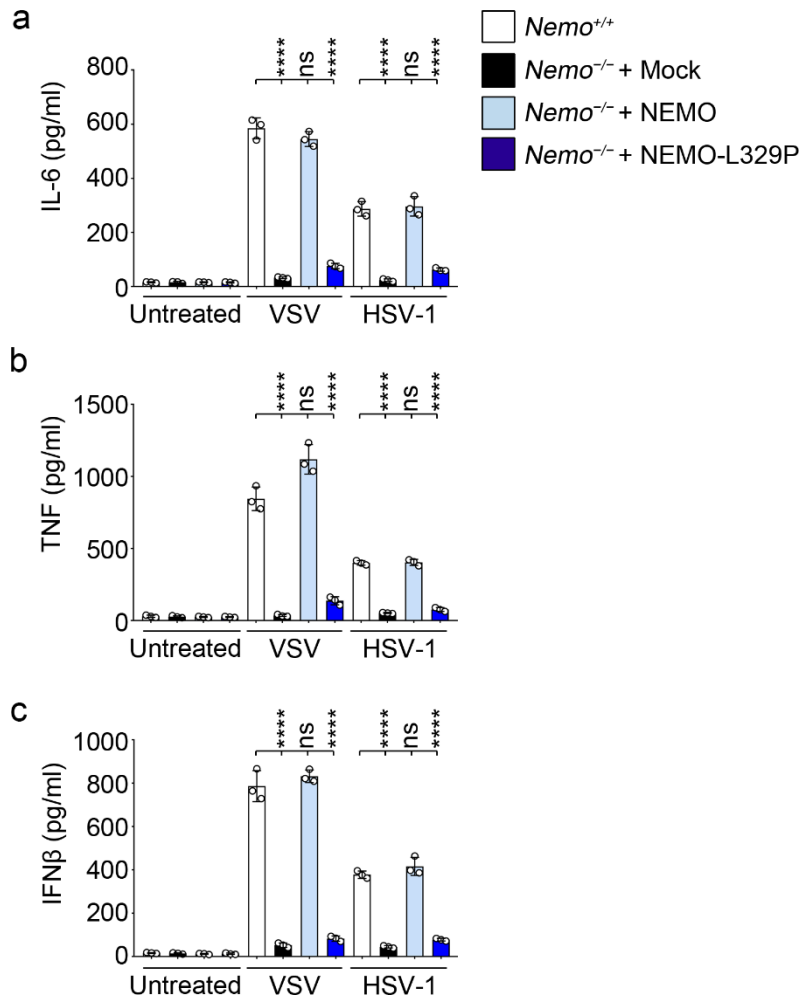

**Figure S6. Ubiquitin-binding domain of NEMO is required for innate antiviral response.** a-c *Nemo*<sup>+/+</sup> or *Nemo*<sup>-/-</sup> RAW264.7 cells rescued with mock, wild type NEMO or mutated NEMO vectors for 48h as indicated were infected with VSV (MOI = 1) or HSV-1 (MOI = 5) viruses for 8h. Levels of IL-6 (a), TNF (b) and IFN $\beta$  (c) in supernatants were measured by ELISA. Results are presented as mean  $\pm$  SD of biological triplicates (One-way ANOVA followed by Bonferroni multiple comparison). One representative experiment of three is shown. ns, not significant; \*\*\*\*,  $p < 0.0001$ .

**Table S1.** TRIM41-associated proteins identified by mass spectrometry. <sup>a,b</sup>

| Sample range       | Protein Accession No. | Protein name  | Protein definition                                    | Peptide count                                                   | Unique peptide count | Cover percent | Molecular weight |
|--------------------|-----------------------|---------------|-------------------------------------------------------|-----------------------------------------------------------------|----------------------|---------------|------------------|
| SR1 (>170 kDa)     | <b>Q8WV44</b>         | <b>TRIM41</b> | <b>E3 ubiquitin-protein ligase TRIM41<sup>c</sup></b> | <b>6</b>                                                        | <b>4</b>             | <b>6.03%</b>  | <b>71670.38</b>  |
|                    | Q9NTJ3                | SMC4          | Structural maintenance of chromosomes protein 4       | 2                                                               | 2                    | 1.79%         | 147182.07        |
|                    | P07814                | EPRS          | Bifunctional glutamate/proline--tRNA ligase           | 2                                                               | 2                    | 1.46%         | 170590.85        |
|                    | P62987                | UBA52         | Ubiquitin-60S ribosomal protein L40                   | 1                                                               | 1                    | 10.16%        | 14728.26         |
|                    | P62979                | RPS27A        | Ubiquitin-40S ribosomal protein S27a                  | 1                                                               | 1                    | 8.33%         | 17964.86         |
|                    | P0CG47                | UBB           | Polyubiquitin-B                                       | 1                                                               | 1                    | 5.68%         | 25761.57         |
|                    | P0CG48                | UBC           | Polyubiquitin-C                                       | 1                                                               | 1                    | 1.90%         | 77038.42         |
|                    | Q9BRJ2                | MRPL45        | 39S ribosomal protein L45, mitochondrial              | 1                                                               | 1                    | 3.27%         | 35350.95         |
|                    | Q00325                | SLC25A3       | Phosphate carrier protein, mitochondrial              | 1                                                               | 1                    | 3.31%         | 40094.92         |
|                    | P62805                | HIST1H4 A     | Histone H4                                            | 1                                                               | 1                    | 9.71%         | 11367.28         |
|                    | Q14152                | EIF3A         | Eukaryotic translation initiation factor 3 subunit A  | 1                                                               | 1                    | 0.58%         | 166570.47        |
|                    | SR2 (>130 kDa)        | <b>P42704</b> | <b>LRPPRC</b>                                         | <b>Leucine-rich PPR motif-containing protein, mitochondrial</b> | <b>2</b>             | <b>2</b>      | <b>1.51%</b>     |
| <b>P05109</b>      |                       | <b>S100A8</b> | <b>Protein S100-A8</b>                                | <b>1</b>                                                        | <b>1</b>             | <b>11.83%</b> | <b>10834.49</b>  |
| O95347             |                       | SMC2          | Structural maintenance of chromosomes protein 2       | 1                                                               | 1                    | 0.92%         | 135655.9         |
| O14974             |                       | PPP1R12 A     | Protein phosphatase 1 regulatory subunit 12A          | 1                                                               | 1                    | 0.97%         | 115280.86        |
| <b>Q4VCS5</b>      |                       | <b>AMOT</b>   | <b>Angiomotin</b>                                     | <b>1</b>                                                        | <b>1</b>             | <b>1.38%</b>  | <b>118085.85</b> |
| O95785             |                       | WIZ           | Protein Wiz                                           | 1                                                               | 1                    | 0.73%         | 178675.23        |
| P05023             |                       | ATP1A1        | Sodium/potassium-transporting ATPase subunit alpha-1  | 1                                                               | 1                    | 1.27%         | 112896.13        |
| SR3 (~110-130 kDa) | P52732                | KIF11         | Kinesin-like protein KIF11                            | 18                                                              | 9                    | 10.42%        | 119158.9         |
|                    | <b>Q13263</b>         | <b>TRIM28</b> | <b>Transcription intermediary factor 1-beta</b>       | <b>7</b>                                                        | <b>4</b>             | <b>6.47%</b>  | <b>88549.91</b>  |



|        |          |                                                                |   |   |        |           |
|--------|----------|----------------------------------------------------------------|---|---|--------|-----------|
| Q8WV44 | TRIM41   | E3 ubiquitin-protein ligase TRIM41                             | 4 | 3 | 5.40%  | 71670.38  |
| Q9HCE1 | MOV10    | Putative helicase MOV-10                                       | 2 | 2 | 2.79%  | 113671.61 |
| P68104 | EEF1A1   | Elongation factor 1-alpha 1                                    | 2 | 1 | 2.38%  | 50140.69  |
| Q05639 | EEF1A2   | Elongation factor 1-alpha 2                                    | 2 | 1 | 2.38%  | 50470.03  |
| Q5VTE0 | EEF1A1P5 | Putative elongation factor 1-alpha-like 3                      | 2 | 1 | 2.38%  | 50184.85  |
| P06576 | ATP5B5   | ATP synthase subunit beta, mitochondrial                       | 2 | 1 | 2.08%  | 56559.96  |
| Q96AV8 | E2F7     | Transcription factor E2F7                                      | 2 | 1 | 1.32%  | 99888.43  |
| Q9H0D6 | XRN2     | 5'-3' exoribonuclease 2                                        | 2 | 1 | 1.26%  | 108582.88 |
| Q92685 | ALG3     | Dol-P-Man:Man(5)GlcNAc(2)-PP-Dol alpha-1,3-mannosyltransferase | 2 | 1 | 1.83%  | 50126.55  |
| P05023 | ATP1A1   | Sodium/potassium-transporting ATPase subunit alpha-1           | 2 | 1 | 1.27%  | 112896.13 |
| P62736 | ACTA2    | Actin, aortic smooth muscle                                    | 1 | 1 | 2.65%  | 42009.01  |
| P60709 | ACTB     | Actin, cytoplasmic 1                                           | 1 | 1 | 2.67%  | 41736.77  |
| P68032 | ACTC1    | Actin, alpha cardiac muscle 1                                  | 1 | 1 | 2.65%  | 42019.01  |
| P63261 | ACTG1    | Actin, cytoplasmic 2                                           | 1 | 1 | 2.67%  | 41792.89  |
| P63267 | ACTG2    | Actin, gamma-enteric smooth muscle                             | 1 | 1 | 2.66%  | 41876.93  |
| P68133 | ACTA1    | Actin, alpha skeletal muscle                                   | 1 | 1 | 2.65%  | 42051.06  |
| P55884 | EIF3B    | Eukaryotic translation initiation factor 3 subunit B           | 1 | 1 | 1.60%  | 92481.88  |
| P62987 | UBA52    | Ubiquitin-60S ribosomal protein L40                            | 1 | 1 | 10.16% | 14728.26  |
| P62979 | RPS27A   | Ubiquitin-40S ribosomal protein S27a                           | 1 | 1 | 8.33%  | 17964.86  |
| P0CG47 | UBB      | Polyubiquitin-B                                                | 1 | 1 | 5.68%  | 25761.57  |
| P0CG48 | UBC      | Polyubiquitin-C                                                | 1 | 1 | 1.90%  | 77038.42  |
| J3QLP7 | UBBP4    | Protein UBBP4                                                  | 1 | 1 | 5.80%  | 25153.98  |
| Q2TAL8 | QRICH1   | Glutamine-rich protein 1                                       | 1 | 1 | 1.42%  | 86435.67  |
| O00410 | IPO5     | Importin-5                                                     | 1 | 1 | 1.00%  | 123630.13 |

|                      |                |                                                                            |                                           |            |              |                  |                 |
|----------------------|----------------|----------------------------------------------------------------------------|-------------------------------------------|------------|--------------|------------------|-----------------|
| O15084               | ANKRD2<br>8    | Serine/threonine-protein phosphatase 6 regulatory ankyrin repeat subunit A | 1                                         | 1          | 1.42%        | 112965.69        |                 |
| P25705               | ATP5A1         | ATP synthase subunit alpha, mitochondrial                                  | 1                                         | 1          | 2.35%        | 59750.67         |                 |
| P33176               | KIF5B          | Kinesin-1 heavy chain                                                      | 1                                         | 1          | 1.56%        | 109684.8         |                 |
| O00748               | CES2           | Cocaine esterase                                                           | 1                                         | 1          | 1.97%        | 61806.95         |                 |
| <b>Q9BXL6</b>        | <b>CARD14</b>  | <b>Caspase recruitment domain-containing protein 14</b>                    | <b>1</b>                                  | <b>1</b>   | <b>1.20%</b> | <b>113270.18</b> |                 |
| Q6UB99               | ANKRD1<br>1    | Ankyrin repeat domain-containing protein 11                                | 1                                         | 1          | 0.26%        | 297914.52        |                 |
| Q71RC2               | LARP4          | La-related protein 4                                                       | 1                                         | 1          | 1.38%        | 80596.16         |                 |
| Q9UDR5               | AASS           | Alpha-aminoadipic semialdehyde synthase, mitochondrial                     | 1                                         | 1          | 1.08%        | 102131.84        |                 |
| Q9HD23               | MRS2           | Magnesium transporter MRS2 homolog, mitochondrial                          | 1                                         | 1          | 2.03%        | 50317.81         |                 |
| Q14444               | CAPRIN1        | Caprin-1                                                                   | 1                                         | 1          | 1.55%        | 78366.36         |                 |
| Q86YZ3               | HRNR           | Hornerin                                                                   | 1                                         | 1          | 0.35%        | 282390.98        |                 |
| <b>P09874</b>        | <b>PARP1</b>   | <b>Poly [ADP-ribose] polymerase 1</b>                                      | <b>1</b>                                  | <b>1</b>   | <b>1.28%</b> | <b>113083.66</b> |                 |
| SR4 (~90-100<br>kDa) | <b>Q8WV44</b>  | <b>TRIM41</b>                                                              | <b>E3 ubiquitin-protein ligase TRIM41</b> | <b>142</b> | <b>18</b>    | <b>17.94%</b>    | <b>71670.38</b> |
| P52732               | KIF11          | Kinesin-like protein KIF11                                                 | 8                                         | 5          | 5.11%        | 119158.9         |                 |
| P23246               | SFPQ           | Splicing factor, proline- and glutamine-rich                               | 6                                         | 2          | 3.54%        | 76149.73         |                 |
| P13639               | EEF2           | Elongation factor 2                                                        | 3                                         | 2          | 2.91%        | 95338.18         |                 |
| Q5VUJ6               | LRCH2          | Leucine-rich repeat and calponin homology domain-containing protein 2      | 2                                         | 2          | 1.70%        | 84588.5          |                 |
| Q6P3W7               | SCYL2          | SCY1-like protein 2                                                        | 2                                         | 2          | 3.01%        | 103708.49        |                 |
| Q13200               | PSMD2          | 26S proteasome non-ATPase regulatory subunit 2                             | 3                                         | 1          | 1.65%        | 100199.83        |                 |
| <b>Q7Z2W4</b>        | <b>ZC3HAV1</b> | <b>Zinc finger CCCH-type antiviral protein 1</b>                           | <b>2</b>                                  | <b>1</b>   | <b>1.66%</b> | <b>101431.46</b> |                 |
| P56192               | MARS           | Methionine--tRNA ligase, cytoplasmic                                       | 2                                         | 1          | 1.11%        | 101115.94        |                 |
| Q9Y5V3               | MAGED1         | Melanoma-associated antigen D1                                             | 2                                         | 1          | 1.41%        | 86161            |                 |

|               |                 |                                                                |                                           |           |              |                 |                 |
|---------------|-----------------|----------------------------------------------------------------|-------------------------------------------|-----------|--------------|-----------------|-----------------|
| A8MWS5        | NBP6L           | Putative neuroblastoma breakpoint family member 6-like protein | 1                                         | 1         | 6.67%        | 27623.25        |                 |
| Q8NF91        | SYNE1           | Nesprin-1                                                      | 1                                         | 1         | 0.18%        | 1011087.5       |                 |
| O75153        | CLUH            | Clustered mitochondria protein homolog                         | 1                                         | 1         | 1.15%        | 146670.27       |                 |
| Q8N0Z6        | TTC5            | Tetratricopeptide repeat protein 5                             | 1                                         | 1         | 3.41%        | 48927.57        |                 |
| <b>Q9NR30</b> | <b>DDX21</b>    | <b>Nucleolar RNA helicase 2</b>                                | <b>1</b>                                  | <b>1</b>  | <b>1.15%</b> | <b>87344.38</b> |                 |
| Q658Y4        | FAM91A1         | Protein FAM91A1                                                | 1                                         | 1         | 1.67%        | 93909.12        |                 |
| Q96FX9        | CLDN15          | Claudin 15                                                     | 1                                         | 1         | 9.38%        | 13777.99        |                 |
| Q5C9Z4        | NOM1            | Nucleolar MIF4G domain-containing protein 1                    | 1                                         | 1         | 1.28%        | 96257.65        |                 |
| Q9Y4D8        | HECTD4          | Probable E3 ubiquitin-protein ligase HECTD4                    | 1                                         | 1         | 0.30%        | 439344.9        |                 |
| P05023        | ATP1A1          | Sodium/potassium-transporting ATPase subunit alpha-1           | 1                                         | 1         | 1.27%        | 112896.13       |                 |
| P12814        | ACTN1           | Alpha-actinin-1                                                | 1                                         | 1         | 1.35%        | 103057.69       |                 |
| SR5 (~90 kDa) | <b>Q8WV44</b>   | <b>TRIM41</b>                                                  | <b>E3 ubiquitin-protein ligase TRIM41</b> | <b>47</b> | <b>9</b>     | <b>11.90%</b>   | <b>71670.38</b> |
| Q9BRS2        | RIOK1           | Serine/threonine-protein kinase RIO1                           | 25                                        | 9         | 17.08%       | 65582.95        |                 |
| <b>P08238</b> | <b>HSP90AB1</b> | <b>Heat shock protein HSP 90-beta 1</b>                        | <b>12</b>                                 | <b>5</b>  | <b>8.84%</b> | <b>83264.38</b> |                 |
| P52732        | KIF11           | Kinesin-like protein KIF11                                     | 6                                         | 4         | 4.45%        | 119158.9        |                 |
| Q8N1F7        | NUP93           | Nuclear pore complex protein Nup93                             | 3                                         | 3         | 4.15%        | 93488.56        |                 |
| P33992        | MCM5            | DNA replication licensing factor MCM5                          | 3                                         | 2         | 3.27%        | 82285.73        |                 |
| O75534        | CSDE1           | Cold shock domain-containing protein E1                        | 3                                         | 2         | 2.76%        | 88884.63        |                 |
| Q01844        | EWSR1           | RNA-binding protein EWS                                        | 2                                         | 1         | 2.13%        | 68478.32        |                 |
| Q16891        | IMMT            | Mitochondrial inner membrane protein                           | 2                                         | 1         | 1.72%        | 83678.12        |                 |
| P50416        | CPT1A           | Carnitine O-palmitoyltransferase 1, liver isoform              | 2                                         | 1         | 1.81%        | 88367.71        |                 |
| Q9P291        | ARMCX1          | Armadillo repeat-containing X-linked protein 1                 | 1                                         | 1         | 2.65%        | 49180.34        |                 |
| P62987        | UBA52           | Ubiquitin-60S ribosomal protein L40                            | 1                                         | 1         | 10.16%       | 14728.26        |                 |
| P62979        | RPS27A          | Ubiquitin-40S ribosomal protein S27a                           | 1                                         | 1         | 8.33%        | 17964.86        |                 |

|               |        |         |                                                           |    |   |        |           |
|---------------|--------|---------|-----------------------------------------------------------|----|---|--------|-----------|
|               | P0CG47 | UBB     | Polyubiquitin-B                                           | 1  | 1 | 5.68%  | 25761.57  |
|               | P0CG48 | UBC     | Polyubiquitin-C                                           | 1  | 1 | 1.90%  | 77038.42  |
|               | J3QLP7 | UBBP4   | Protein UBBP4                                             | 1  | 1 | 5.80%  | 25153.98  |
|               | Q9P2Z0 | THAP10  | THAP domain-containing protein 10                         | 1  | 1 | 3.89%  | 28350.85  |
|               | Q12906 | ILF3    | Interleukin enhancer-binding factor 3                     | 1  | 1 | 1.57%  | 95338.39  |
|               | Q8IXB1 | DNAJC10 | homolog subfamily C member 10                             | 1  | 1 | 1.39%  | 91079.75  |
|               | O14641 | DVL2    | Segment polarity protein dishevelled homolog DVL-2        | 1  | 1 | 1.63%  | 78948.31  |
|               | Q7Z736 | PLEKHH3 | Pleckstrin homology domain-containing family H member 3   | 1  | 1 | 1.51%  | 85317.88  |
|               | Q92499 | DDX1    | ATP-dependent RNA helicase DDX1                           | 1  | 1 | 2.16%  | 82432.04  |
|               | Q8N485 | LIX1    | Protein limb expression 1 homolog                         | 1  | 1 | 2.48%  | 31891.48  |
|               | P49959 | MRE11A  | Double-strand break repair protein MRE11A                 | 1  | 1 | 1.69%  | 80593.4   |
|               | Q14562 | DHX8    | ATP-dependent RNA helicase DHX8                           | 1  | 1 | 0.82%  | 139314.72 |
|               | Q92620 | DHX38   | Pre-mRNA-splicing factor ATP-dependent RNA helicase PRP16 | 1  | 1 | 0.81%  | 140503.2  |
|               | Q86YZ3 | HRNR    | Hornerin                                                  | 1  | 1 | 0.35%  | 282390.98 |
|               | Q9P2D8 | UNC79   | Protein unc-79 homolog                                    | 1  | 1 | 0.61%  | 295313.15 |
| SR6 (~80 kDa) | Q8WV44 | TRIM41  | E3 ubiquitin-protein ligase TRIM41                        | 18 | 7 | 9.84%  | 71670.38  |
|               | Q9BRS2 | RIOK1   | Serine/threonine-protein kinase RIO1                      | 17 | 7 | 14.44% | 65582.95  |
|               | P23588 | EIF4B   | Eukaryotic translation initiation factor 4B               | 12 | 7 | 12.27% | 69151.64  |
|               | Q92841 | DDX17   | Probable ATP-dependent RNA helicase DDX17                 | 9  | 5 | 7.27%  | 80272.66  |
|               | P11021 | HSPA5   | 78 kDa glucose-regulated protein                          | 6  | 4 | 8.41%  | 72332.86  |
|               | O14545 | TRAFD1  | TRAF-type zinc finger domain-containing protein 1         | 4  | 2 | 4.30%  | 64841.33  |
|               | Q9Y4W6 | AFG3L2  | AFG3-like protein 2                                       | 2  | 2 | 2.89%  | 88583.71  |
|               | Q13409 | DYNC1L2 | Cytoplasmic dynein 1 intermediate chain 2                 | 3  | 1 | 3.29%  | 71456.69  |
|               | Q92945 | KHSRP   | Far upstream element-binding protein 2                    | 1  | 1 | 1.97%  | 73115.45  |

|                      |               |               |                                                   |           |           |               |                 |
|----------------------|---------------|---------------|---------------------------------------------------|-----------|-----------|---------------|-----------------|
|                      | P35637        | FUS           | RNA-binding protein FUS                           | 1         | 1         | 2.66%         | 53425.81        |
|                      | Q92804        | TAF15         | TATA-binding protein-associated factor 2N         | 1         | 1         | 2.36%         | 61830.02        |
|                      | <b>Q8ND56</b> | <b>LSM14A</b> | <b>Protein LSM14 homolog A</b>                    | <b>1</b>  | <b>1</b>  | <b>2.38%</b>  | <b>50530.01</b> |
|                      | P52732        | KIF11         | Kinesin-like protein KIF11                        | 1         | 1         | 0.85%         | 119158.9        |
|                      | Q9P270        | SLAIN2        | SLAIN motif-containing protein 2                  | 1         | 1         | 2.93%         | 62543.68        |
|                      | P42166        | TMPO          | Lamina-associated polypeptide 2, isoform alpha    | 1         | 1         | 2.31%         | 75492.19        |
|                      | Q00325        | SLC25A3       | Phosphate carrier protein, mitochondrial          | 1         | 1         | 7.18%         | 40094.92        |
| <b>SR7 (~70 kDa)</b> | <b>P11142</b> | <b>HSPA8</b>  | <b>Heat shock cognate 71 kDa protein</b>          | <b>56</b> | <b>17</b> | <b>26.78%</b> | <b>70897.96</b> |
|                      | <b>Q8WV44</b> | <b>TRIM41</b> | <b>E3 ubiquitin-protein ligase TRIM41</b>         | <b>51</b> | <b>8</b>  | <b>11.59%</b> | <b>71670.38</b> |
|                      | P38646        | HSPA9         | Stress-70 protein, mitochondrial                  | 11        | 8         | 13.40%        | 73680.41        |
|                      | Q92841        | DDX17         | Probable ATP-dependent RNA helicase DDX17         | 12        | 6         | 10.84%        | 80272.66        |
|                      | P34931        | HSPA1L        | Heat shock 70 kDa protein 1-like                  | 8         | 5         | 10.45%        | 70374.95        |
|                      | P08107        | HSPA1A        | Heat shock 70 kDa protein 1A/1B                   | 8         | 5         | 9.67%         | 70052.18        |
|                      | P17066        | HSPA6         | Heat shock 70 kDa protein 6                       | 8         | 4         | 8.24%         | 71028.19        |
|                      | P52272        | HNRNPM        | Heterogeneous nuclear ribonucleoprotein M         | 6         | 4         | 5.62%         | 77515.48        |
|                      | Q9UNF1        | MAGED2        | Melanoma-associated antigen D2                    | 5         | 3         | 5.45%         | 64954.31        |
|                      | <b>O14744</b> | <b>PRMT5</b>  | <b>Protein arginine N-methyltransferase 5</b>     | <b>5</b>  | <b>3</b>  | <b>5.02%</b>  | <b>72684.05</b> |
|                      | P40939        | HADHA         | Trifunctional enzyme subunit alpha, mitochondrial | 4         | 3         | 4.59%         | 82999.58        |
|                      | P35637        | FUS           | RNA-binding protein FUS                           | 2         | 2         | 3.04%         | 53425.81        |
|                      | <b>Q9UJV9</b> | <b>DDX41</b>  | <b>Probable ATP-dependent RNA helicase DDX41</b>  | <b>2</b>  | <b>1</b>  | <b>1.77%</b>  | <b>69837.79</b> |
|                      | <b>O75143</b> | <b>ATG13</b>  | <b>Autophagy-related protein 13</b>               | <b>1</b>  | <b>1</b>  | <b>2.13%</b>  | <b>56571.92</b> |
|                      | Q15054        | POLD3         | DNA polymerase delta subunit 3                    | 1         | 1         | 2.58%         | 51400.24        |
|                      | <b>Q8WV28</b> | <b>BLNK</b>   | <b>B-cell linker protein</b>                      | <b>1</b>  | <b>1</b>  | <b>1.97%</b>  | <b>50466.54</b> |
|                      | Q96AE4        | FUBP1         | Far upstream element-binding protein 1            | 1         | 1         | 2.02%         | 67560.45        |
|                      | O95573        | ACSL3         | Long-chain-fatty-acid--CoA ligase 3               | 1         | 1         | 2.08%         | 80420.06        |

|                  |        |         |                                                |     |    |        |           |
|------------------|--------|---------|------------------------------------------------|-----|----|--------|-----------|
|                  | Q9UG63 | ABCF2   | ATP-binding cassette sub-family F member 2     | 1   | 1  | 1.77%  | 71290.27  |
| SR8 (~60-65 kDa) | Q9NVI7 | ATAD3A  | ATPase family AAA domain-containing protein 3A | 9   | 6  | 9.94%  | 71369.32  |
|                  | Q8WV44 | TRIM41  | E3 ubiquitin-protein ligase TRIM41             | 9   | 5  | 8.25%  | 71670.38  |
|                  | O95831 | AIFM1   | Apoptosis-inducing factor 1, mitochondrial     | 7   | 4  | 7.83%  | 66900.63  |
|                  | P49368 | CCT3    | T-complex protein 1 subunit gamma              | 7   | 4  | 8.07%  | 60533.83  |
|                  | P28288 | ABCD3   | ATP-binding cassette sub-family D member 3     | 2   | 2  | 4.40%  | 75475.99  |
|                  | E5RGY8 | OSR2    | Protein odd-skipped-related 2 (Fragment)       | 1   | 1  | 3.70%  | 30107.96  |
|                  | P17844 | DDX5    | Probable ATP-dependent RNA helicase DDX5       | 1   | 1  | 1.79%  | 69148.13  |
|                  | Q96CJ1 | EAF2    | ELL-associated factor 2                        | 1   | 1  | 4.23%  | 28791.63  |
|                  | Q9UFD9 | RIMBP3  | RIMS-binding protein 3A                        | 1   | 1  | 0.92%  | 180718.37 |
|                  | P61978 | HNRNPK  | Heterogeneous nuclear ribonucleoprotein K      | 1   | 1  | 2.38%  | 50976.43  |
| SR9 (~55 kDa)    | P07437 | TUBB    | Tubulin beta chain                             | 142 | 20 | 56.31% | 49670.85  |
|                  | P68371 | TUBB4B  | Tubulin beta-4B chain                          | 123 | 20 | 56.18% | 49831.04  |
|                  | P04350 | TUBB4A  | Tubulin beta-4A chain                          | 117 | 18 | 49.55% | 49585.81  |
|                  | Q13885 | TUBB2A  | Tubulin beta-2A chain                          | 116 | 15 | 38.20% | 49907.02  |
|                  | Q13509 | TUBB3   | Tubulin beta-3 chain                           | 106 | 11 | 27.56% | 50432.75  |
|                  | Q9BUF5 | TUBB6   | Tubulin beta-6 chain                           | 66  | 6  | 14.35% | 49857.16  |
|                  | P31943 | HNRNPH1 | Heterogeneous nuclear ribonucleoprotein H1     | 17  | 4  | 12.25% | 49229.59  |
|                  | P25705 | ATP5A1  | ATP synthase subunit alpha, mitochondrial      | 6   | 4  | 10.31% | 59750.67  |
|                  | Q9Y230 | RUVBL2  | RuvB-like 2                                    | 5   | 3  | 7.78%  | 51156.58  |
|                  | Q71U36 | TUBA1A  | Tubulin alpha-1A chain                         | 4   | 3  | 10.86% | 50135.7   |
|                  | P68363 | TUBA1B  | Tubulin alpha-1B chain                         | 4   | 3  | 10.86% | 50151.71  |
|                  | Q9BQE3 | TUBA1C  | Tubulin alpha-1C chain                         | 4   | 3  | 10.91% | 49895.39  |

|                   |               |               |                                                                               |          |          |              |                 |
|-------------------|---------------|---------------|-------------------------------------------------------------------------------|----------|----------|--------------|-----------------|
|                   | Q13748        | TUBA3C        | Tubulin alpha-3C/D                                                            | 4        | 3        | 10.89%       | 49959.62        |
|                   | Q1ZYQ1        | TUBA2         | Tubulin, alpha 2                                                              | 4        | 3        | 10.89%       | 49959.62        |
|                   | <b>Q8WV44</b> | <b>TRIM41</b> | <b>E3 ubiquitin-protein ligase TRIM41</b>                                     | <b>4</b> | <b>3</b> | <b>5.24%</b> | <b>71670.38</b> |
|                   | Q15084        | PDIA6         | Protein disulfide-isomerase A6                                                | 3        | 2        | 4.09%        | 48121.38        |
|                   | P36578        | RPL4          | 60S ribosomal protein L4                                                      | 2        | 1        | 2.58%        | 47697.19        |
|                   | Q8NEY1        | NAV1          | Neuron navigator 1                                                            | 2        | 1        | 0.64%        | 202472.16       |
|                   | P56182        | RRP1          | Ribosomal RNA processing protein 1 homolog A                                  | 2        | 1        | 2.60%        | 52839.4         |
|                   | P08670        | VIM           | Vimentin                                                                      | 2        | 1        | 3.00%        | 53651.88        |
|                   | Q68CQ1        | HEATR8        | HEAT repeat-containing protein 8                                              | 1        | 1        | 0.83%        | 145647.13       |
|                   | B7ZBM2        | C1orf175      | Chromosome 1 open reading frame 175                                           | 1        | 1        | 1.23%        | 100361.73       |
|                   | P68104        | EEF1A1        | Elongation factor 1-alpha 1                                                   | 1        | 1        | 2.38%        | 50140.69        |
|                   | <b>P19474</b> | <b>TRIM21</b> | <b>E3 ubiquitin-protein ligase TRIM21</b>                                     | <b>1</b> | <b>1</b> | <b>1.89%</b> | <b>54169.86</b> |
|                   | P39656        | DDOST         | Dolichyl-diphosphooligosaccharide--protein glycosyltransferase 48 kDa subunit | 1        | 1        | 2.41%        | 50800.96        |
|                   | Q13625        | TP53BP2       | Apoptosis-stimulating of p53 protein 2                                        | 1        | 1        | 1.06%        | 125616.74       |
|                   | Q8NDQ6        | ZNF540        | Zinc finger protein 540                                                       | 1        | 1        | 2.58%        | 77093.81        |
|                   | Q8TAG5        | VSTM2A        | V-set and transmembrane domain-containing protein 2A                          | 1        | 1        | 6.36%        | 25833.34        |
|                   | Q14257        | RCN2          | Reticulocalbin-2                                                              | 1        | 1        | 3.79%        | 36876.63        |
| SR10 (~43-50 kDa) | P49411        | TUFM          | Elongation factor Tu, mitochondrial                                           | 5        | 3        | 8.41%        | 49541.51        |
|                   | P62736        | ACTA2         | Actin, aortic smooth muscle                                                   | 4        | 3        | 9.81%        | 42009.01        |
|                   | P60709        | ACTB          | Actin, cytoplasmic 1                                                          | 4        | 3        | 9.87%        | 41736.77        |
|                   | P68032        | ACTC1         | Actin, alpha cardiac muscle 1                                                 | 4        | 3        | 9.81%        | 42019.01        |
|                   | P63261        | ACTG1         | Actin, cytoplasmic 2                                                          | 4        | 3        | 9.87%        | 41792.89        |
|                   | P63267        | ACTG2         | Actin, gamma-enteric smooth muscle                                            | 4        | 3        | 9.84%        | 41876.93        |
|                   | P68133        | ACTA1         | Actin, alpha skeletal muscle                                                  | 4        | 3        | 9.81%        | 42051.06        |

|                      |        |              |                                                                         |   |   |        |           |
|----------------------|--------|--------------|-------------------------------------------------------------------------|---|---|--------|-----------|
|                      | Q14103 | HNRNPD       | Heterogeneous nuclear ribonucleoprotein D0                              | 2 | 1 | 3.94%  | 38434.13  |
|                      | O60884 | DNAJA2       | DnaJ homolog subfamily A member 2                                       | 2 | 1 | 3.16%  | 45745.65  |
|                      | Q9BQA1 | WDR77        | Methylosome protein 50                                                  | 2 | 1 | 4.39%  | 36724.46  |
|                      | P31689 | DNAJA1       | DnaJ homolog subfamily A member 1                                       | 2 | 1 | 3.27%  | 44868.19  |
|                      | P50454 | SERPINH<br>1 | Serpin H1                                                               | 1 | 1 | 2.63%  | 46440.56  |
|                      | Q12872 | SFSWAP       | Splicing factor, suppressor of white-apricot homolog                    | 1 | 1 | 1.05%  | 104822.06 |
|                      | Q4U2R8 | SCL22A6      | Solute carrier family 22 member 6                                       | 1 | 1 | 2.13%  | 61816.37  |
|                      | O75821 | EIF3G        | Eukaryotic translation initiation factor 3 subunit G                    | 1 | 1 | 2.50%  | 35611.01  |
| SR11 (~35-40<br>kDa) | P54105 | CLNS1A       | Methylosome subunit pICln                                               | 3 | 1 | 5.49%  | 26215.48  |
|                      | O75477 | ERLIN1       | Erlin-1                                                                 | 2 | 1 | 3.47%  | 38925.84  |
|                      | Q02878 | RPL6         | 60S ribosomal protein L6                                                | 1 | 1 | 3.12%  | 32727.79  |
|                      | P05109 | S100A8       | Protein S100-A8                                                         | 1 | 1 | 11.83% | 10834.49  |
|                      | Q16637 | SMN1         | Survival motor neuron protein                                           | 1 | 1 | 3.40%  | 31848.78  |
|                      | Q9P035 | PTPLAD1      | Very-long-chain (3R)-3-hydroxyacyl-[acyl-carrier protein] dehydratase 3 | 1 | 1 | 2.49%  | 43159.62  |
|                      | P61626 | LYZ          | Lysozyme C                                                              | 1 | 1 | 6.08%  | 16536.97  |
|                      | Q9Y3F4 | STRAP        | Serine-threonine kinase receptor-associated protein                     | 1 | 1 | 3.43%  | 38438.33  |
|                      | Q01081 | U2AF1        | Splicing factor U2AF 35 kDa subunit                                     | 1 | 1 | 5.42%  | 27872.19  |
|                      | Q86YZ3 | HRNR         | Hornerin                                                                | 1 | 1 | 0.35%  | 282390.98 |
|                      | Q9BWF3 | RBM4         | RNA-binding protein 4                                                   | 1 | 1 | 4.40%  | 40313.98  |
| SR12 (~30<br>kDa)    | P12004 | PCNA         | Proliferating cell nuclear antigen                                      | 6 | 3 | 14.94% | 28768.8   |
|                      | P50402 | EMD          | Emerin                                                                  | 5 | 3 | 14.57% | 28994.06  |
|                      | Q02878 | RPL6         | 60S ribosomal protein L6                                                | 3 | 2 | 5.21%  | 32727.79  |



|                       |          |                                                                |                                     |    |        |           |          |
|-----------------------|----------|----------------------------------------------------------------|-------------------------------------|----|--------|-----------|----------|
| P22087                | FBL      | rRNA 2'-O-methyltransferase fibrillar                          | 3                                   | 2  | 6.85%  | 33784.17  |          |
| P68104                | EEF1A1   | Elongation factor 1-alpha 1                                    | 2                                   | 1  | 2.38%  | 50140.69  |          |
| Q05639                | EEF1A2   | Elongation factor 1-alpha 2                                    | 2                                   | 1  | 2.38%  | 50470.03  |          |
| Q5VTE0                | EEF1A1P5 | Putative elongation factor 1-alpha-like 3                      | 2                                   | 1  | 2.38%  | 50184.85  |          |
| P05109                | S100A8   | Protein S100-A8                                                | 2                                   | 1  | 11.83% | 10834.49  |          |
| P04406                | GAPDH    | Glyceraldehyde-3-phosphate dehydrogenase                       | 2                                   | 1  | 4.48%  | 36053.05  |          |
| O00165                | HAX1     | HCLS1-associated protein X-1                                   | 2                                   | 1  | 3.94%  | 31620.76  |          |
| Q9JEU0                | VTI1B    | Vesicle transport through interaction with t-SNAREs homolog 1B | 2                                   | 1  | 4.74%  | 26688.49  |          |
| Q8NHW5                | RPLP0P6  | 60S acidic ribosomal protein P0-like                           | 1                                   | 1  | 3.79%  | 34364.47  |          |
| P43307                | SSR1     | Translocon-associated protein subunit alpha                    | 1                                   | 1  | 3.85%  | 32235.45  |          |
| O15460                | P4HA2    | Prolyl 4-hydroxylase subunit alpha-2                           | 1                                   | 1  | 1.68%  | 60902.07  |          |
| P62805                | HIST1H4A | Histone H4                                                     | 1                                   | 1  | 9.71%  | 11367.28  |          |
| P61964                | WDR5     | WD repeat-containing protein 5                                 | 1                                   | 1  | 3.29%  | 36588.36  |          |
| Q9H4D0                | CLSTN2   | Calsyntenin-2                                                  | 1                                   | 1  | 1.15%  | 107005.88 |          |
| P14866                | HNRNPL   | Heterogeneous nuclear ribonucleoprotein L                      | 1                                   | 1  | 3.06%  | 64132.9   |          |
| Q6P4A7                | SFXN4    | Sideroflexin-4                                                 | 1                                   | 1  | 4.45%  | 37998.44  |          |
| Q86YZ3                | HRNR     | Hornerin                                                       | 1                                   | 1  | 0.35%  | 282390.98 |          |
| SR13 ( $\leq 25$ kDa) | P05141   | SLC25A5                                                        | ADP/ATP translocase 2               | 11 | 6      | 19.46%    | 32852.17 |
|                       | P12236   | SLC25A6                                                        | ADP/ATP translocase 3               | 10 | 5      | 17.79%    | 32866.21 |
|                       | P62701   | RPS4X                                                          | 40S ribosomal protein S4, X isoform | 6  | 3      | 11.41%    | 29597.64 |
|                       | P25789   | PSMA4                                                          | Proteasome subunit alpha type-4     | 4  | 3      | 14.56%    | 29483.81 |
|                       | P23396   | RPS3                                                           | 40S ribosomal protein S3            | 4  | 3      | 16.87%    | 26688.31 |

|            |               |                                                                         |   |   |       |           |
|------------|---------------|-------------------------------------------------------------------------|---|---|-------|-----------|
| P27348     | YWHAQ         | 14-3-3 protein theta                                                    | 3 | 2 | 8.98% | 27764.29  |
| Q9Y657     | SPIN1         | Spindlin-1                                                              | 2 | 2 | 8.78% | 29600.55  |
| Q02978     | SLC25A1<br>1  | Mitochondrial 2-oxoglutarate/malate carrier protein                     | 2 | 1 | 5.10% | 34061.66  |
| P53007     | SLC25A1       | Tricarboxylate transport protein, mitochondrial                         | 1 | 1 | 3.54% | 34012.64  |
| Q9NPF8     | ADAP2         | Arf-GAP with dual PH domain-containing protein 2                        | 1 | 1 | 2.89% | 44348.97  |
| Q9H5I5     | PIEZO2        | Piezo-type mechanosensitive ion channel component 2                     | 1 | 1 | 0.36% | 318064.72 |
| Q5T653     | MRPL2         | 39S ribosomal protein L2, mitochondrial                                 | 1 | 1 | 3.28% | 33300.77  |
| P62917     | RPL8          | 60S ribosomal protein L8                                                | 1 | 1 | 4.28% | 28024.58  |
| Q6PQ33     | LINC0027<br>3 | Protein LINC00273                                                       | 1 | 1 | 1.52% | 49322.27  |
| P18124     | RPL7          | 60S ribosomal protein L7                                                | 1 | 1 | 4.44% | 29225.74  |
| Q00325     | SLC25A3       | Phosphate carrier protein, mitochondrial                                | 1 | 1 | 3.31% | 40094.92  |
| Q9JEU0     | VTI1B         | Vesicle transport through interaction with t-SNAREs homolog 1B          | 1 | 1 | 4.74% | 26688.49  |
| Q9NPL8SV=2 | TIMMDC<br>1   | Translocase of inner mitochondrial membrane domain-containing protein 1 | 1 | 1 | 3.86% | 32177.82  |
| Q9Y5M8     | SRPRB         | Signal recognition particle receptor subunit beta                       | 1 | 1 | 7.01% | 29702.23  |

<sup>a</sup> The TRIM41-associated proteins in TRIM41-Flag-transfected HEK293T cells after immunoprecipitation were analyzed by LC-MS. SR (subregion) 1-13 represent different regions in the gel with different molecular weight.

<sup>b</sup> Note that the house-keeping proteins, such as kinesins, actins, tubulins, heat shock proteins and translation factors, have not been excluded from the lists.

<sup>c</sup> The fonts of TRIM41 and the TRIM41-associated proteins that have been reported to be involved in inflammatory or infectious processes are in red.

**Table S2.** Sequences used in this study.

| <b>Primers for genotyping of <i>Trim41</i> knockout mice</b>            |                              |                                              |
|-------------------------------------------------------------------------|------------------------------|----------------------------------------------|
| Primer name                                                             | Primer sequence (5'→3')      | Result judgment                              |
| P1                                                                      | CTCCATGGTTTGTTCAGTTGGAG      | P1+P2 (~600 bp)                              |
| P2                                                                      | CTTGGCTGCAGGTCGTCGAAATT<br>C | Positive: -/- or +/-<br>Negative: +/+        |
| P3                                                                      | GGAACCACTTAGGAAGCATCTAG      | P3+P4 (~750 bp)                              |
| P4                                                                      | CAATCACAATGTGCTATCTGGC       | Positive: +/+ or +/-<br>Negative: -/- or +/- |
| <b><i>Bcl10</i>-specific targeted sequences for CRISPR-Cas9 edition</b> |                              |                                              |
| Sequence No.                                                            | Sequence                     | KO efficiency                                |
| 1                                                                       | GCCGAACTTCAAGTAGAAAA         | No                                           |
| 2                                                                       | GATGAGGTGCTAAAGCTT           | No                                           |
| 3                                                                       | GCCACCAACAACCTCTCT           | Yes                                          |
| 4                                                                       | CGGCTCCCTTCTTCTCTA           | Yes                                          |
| <b><i>Nemo</i>-specific targeted sequences for CRISPR-Cas9 edition</b>  |                              |                                              |
| Sequence No.                                                            | Sequence                     | KO efficiency                                |
| 1                                                                       | GCATGTCCTGGTCCTCTGC          | Yes                                          |
| 2                                                                       | AGCAGAGGACCAGGACATGC         | No                                           |
| 3                                                                       | AGGATCGGCAAGCTTTAG           | No                                           |
| 4                                                                       | GCAAGGCAGCCTCCACGCTC         | No                                           |
| <b><i>Trim41</i>-specific siRNA sequences</b>                           |                              |                                              |
| Sequence name                                                           | Sequence (5'→3')             | Knockdown efficiency                         |
| siRNA1                                                                  | CCAUCUGCCUCGAUUACUUTT        | Highest and selected                         |
|                                                                         | AAGUAAUCGAGGCAGAUGGTT        |                                              |
| siRNA2                                                                  | GGAACCACUUAGGAAGCAUTT        | High                                         |
|                                                                         | AUGCUUCCUAAGUGGUUCCTT        |                                              |

|        |                       |      |
|--------|-----------------------|------|
| siRNA3 | GCGCCUAGGCUUCUACAAUTT | High |
|        | AUUGUAGAAGCCUAGGCGCTT |      |

**Primers for Q-PCR assays**

| Gene name   | Primer sequence (5'→3') |                             |
|-------------|-------------------------|-----------------------------|
|             | Sense                   | Anti-sense                  |
| <i>Il6</i>  | GAGTTGTGCAATGGCAATTCTG  | GCAAGTGCATCATCGTTGTTCA<br>T |
| <i>Ifnb</i> | CAGCTCCAAGAAAGGACGAAC   | GGCAGTGTA ACTCTTCTGCAT      |
| <i>Tnf</i>  | CCCTCACACTCAGATCATCTTCT | GCTACGACGTGGGCTACAG         |
| <i>Actb</i> | AGTGTGACGTTGACATCCGT    | GCAGCTCAGTAACAGTCCGC        |

**Table S3.** Antibodies used in this study.

| <b>Company</b>                             | <b>Product name</b>                             | <b>Clone No.</b> | <b>Cat. No.</b> |
|--------------------------------------------|-------------------------------------------------|------------------|-----------------|
| Cell Signaling Technology<br>(Beverly, MA) | Anti- IKK $\alpha$ / $\beta$<br>(Ser176/Ser180) | C84E11           | 2078            |
|                                            | Anti- IKK $\beta$                               | D30C6            | 8943            |
|                                            | Anti- I $\kappa$ B $\alpha$                     | 44D4             | 4812            |
|                                            | Anti- I $\kappa$ B $\alpha$ (Ser32/Ser36)       | 5A5              | 9246            |
|                                            | Anti-BCL10                                      | C78F1            | 4237            |
|                                            | Anti-CARD11                                     | 1D12             | 4435            |
|                                            | Anti-CARD9                                      | NA               | 12283           |
|                                            | Anti-ERK1/2                                     | 137F5            | 4695            |
|                                            | Anti-ERK1/2<br>(Thr202/Tyr204)                  | D13.14.4E        | 4370            |
|                                            | Anti-Flag tag                                   | 9A3              | 8146            |
|                                            | Anti-GAPDH                                      | D16H11           | 5174            |
|                                            | Anti-HA tag                                     | C29F4            | 3724            |
|                                            | Anti-IRF3                                       | D83B9            | 4302            |
|                                            | Anti-JNK1/2                                     | 56G8             | 9258            |
|                                            | Anti-JNK1/2<br>(Thr183/Tyr185)                  | 81E11            | 4668            |
|                                            | Anti-MAVS                                       | NA               | 4983            |
|                                            | Anti-Myc tag                                    | 71D10            | 2278            |
|                                            | Anti-p38                                        | D13E1            | 8690            |
|                                            | Anti-p38 (Thr180/Tyr182)                        | 12F8             | 4631            |
|                                            | Anti-p65                                        | L8F6             | 6956            |
|                                            | Anti-phospho-IRF3<br>(Ser396)                   | 4D4G             | 4947            |
|                                            | Anti-phospho-TBK1<br>(Ser172)                   | D52C2            | 5483            |
|                                            | Anti-STING                                      | D2P2F            | 13647           |
| Anti-TBK1                                  | D1B4                                            | 3504             |                 |
| Anti-Ubiquitin                             | P4D1                                            | 3936             |                 |
| Bethyl Labs                                | Anti-ADAR1                                      | NA               | A303-884A       |

|                            |                |       |         |
|----------------------------|----------------|-------|---------|
| Abcam Inc. (Cambridge, MA) | Anti-HSV-tag   | NA    | ab19354 |
|                            | Anti-Lamin A   | 133A2 | ab8980  |
|                            | Anti-TREX1     | NA    | ab83890 |
|                            | Anti-TRIM41    | NA    | ab98170 |
| MBL International          | Anti-IKK gamma | EA2-6 | K0159-3 |

NA, not applicable.
